# Supplementary material
Source: PubMed Central journal article supplement (PMC4112597)
Supplement: NIHMS521041-supplement-01.pdf [file NIHMS521041-supplement-01.pdf]

**Table A1: Sample Districts and Attributes**

| City of Central District                                 | State of Central District | 1970 MSA Enrollment | 1970 Central District Enrollment | 1970 CD Public Enrollment | 1970 CD Public % Black | Desegregation Year | County District  |
|----------------------------------------------------------|---------------------------|---------------------|----------------------------------|---------------------------|------------------------|--------------------|------------------|
| <b>Panel A: Large Central School Districts in Sample</b> |                           |                     |                                  |                           |                        |                    |                  |
| Birmingham                                               | AL                        | 178                 | 69                               | 65                        | 52%                    | 1970               | No               |
| Mobile                                                   | AL                        | 99                  | 84                               | 72                        | 42%                    | 1971               | Yes              |
| Tucson                                                   | AZ                        | 83                  | 56                               | 53                        | 4%                     | 1978               | No               |
| Fresno                                                   | CA                        | 115                 | 59                               | 57                        | 9%                     | 1978               | No               |
| Los Angeles                                              | CA                        | 1,538               | 698                              | 614                       | 23%                    | 1978               | No               |
| Oakland                                                  | CA                        | 377                 | 69                               | 60                        | 56%                    | 1966               | No               |
| Sacramento                                               | CA                        | 189                 | 53                               | 48                        | 12%                    | 1976               | No               |
| San Diego                                                | CA                        | 299                 | 132                              | 122                       | 12%                    | 1977               | No               |
| San Francisco                                            | CA                        | 279                 | 108                              | 84                        | 26%                    | 1971               | Yes              |
| Denver                                                   | CO                        | 270                 | 104                              | 89                        | 14%                    | 1974               | Yes <sup>c</sup> |
| Wilmington*                                              | DE                        | 110                 | 18                               | 14                        | 73%                    | 1978               | No               |
| Fort Lauderdale                                          | FL                        | 122                 | 122                              | 110                       | 21%                    | 1970               | Yes              |
| Jacksonville                                             | FL                        | 151                 | 129                              | 120                       | 28%                    | 1971               | Yes              |
| Lakeland                                                 | FL                        | 53                  | 53                               | 51                        | 23%                    | 1969               | Yes              |
| Miami                                                    | FL                        | 263                 | 263                              | 233                       | 23%                    | 1970               | Yes              |
| Orlando                                                  | FL                        | 126                 | 84                               | 79                        | 18%                    | 1972               | Yes              |
| Tampa                                                    | FL                        | 213                 | 112                              | 102                       | 18%                    | 1971               | Yes              |
| Titusville                                               | FL                        | 63                  | 62                               | 58                        | 11%                    | 1969               | Yes              |
| West Palm Beach                                          | FL                        | 72                  | 72                               | 64                        | 27%                    | 1970               | Yes              |
| Atlanta                                                  | GA                        | 411                 | 95                               | 88                        | 64%                    | 1973               | No               |
| Chicago                                                  | IL                        | 1,674               | 724                              | 542                       | 54%                    | 1982               | No               |
| Indianapolis                                             | IN                        | 305                 | 110                              | 98                        | 35%                    | 1973               | No               |
| Wichita                                                  | KS                        | 101                 | 67                               | 61                        | 13%                    | 1971               | No               |
| Louisville*                                              | KY                        | 226                 | 60                               | 50                        | 45%                    | 1975               | No               |
| Baton Rouge                                              | LA                        | 97                  | 72                               | 65                        | 34%                    | 1970               | Yes              |
| New Orleans                                              | LA                        | 293                 | 141                              | 105                       | 66%                    | 1961               | Yes              |
| Shreveport                                               | LA                        | 84                  | 57                               | 53                        | 45%                    | 1969               | Yes              |
| Boston                                                   | MA                        | 943                 | 118                              | 85                        | 30%                    | 1974               | No               |
| Baltimore                                                | MD                        | 498                 | 208                              | 178                       | 65%                    | 1974               | Yes              |
| Detroit                                                  | MI                        | 1,131               | 322                              | 261                       | 63%                    | 1975               | No               |
| Minneapolis                                              | MN                        | 502                 | 77                               | 63                        | 8%                     | 1974               | No               |
| Kansas City                                              | MO                        | 329                 | 75                               | 65                        | 47%                    | 1977               | No               |
| St. Louis                                                | MO                        | 604                 | 134                              | 106                       | 64%                    | 1980               | Yes              |
| Charlotte                                                | NC                        | 197                 | 86                               | 82                        | 29%                    | 1970               | Yes              |

**Table A1: Sample Districts and Attributes, continued**

| City of Central District                                            | State of Central District | 1970 MSA Enrollment | 1970 Central District Enrollment | 1970 CD Public Enrollment | 1970 CD Public % Black | Desegregation Year | County District |
|---------------------------------------------------------------------|---------------------------|---------------------|----------------------------------|---------------------------|------------------------|--------------------|-----------------|
| <b>Panel A: Large Central School Districts in Sample, continued</b> |                           |                     |                                  |                           |                        |                    |                 |
| Omaha                                                               | NE                        | 143                 | 78                               | 58                        | 18%                    | 1976               | No              |
| Newark                                                              | NJ                        | 455                 | 90                               | 78                        | 71%                    | 1961               | No              |
| Las Vegas                                                           | NV                        | 71                  | 64                               | 61                        | 12%                    | 1972               | Yes             |
| Buffalo                                                             | NY                        | 326                 | 97                               | 69                        | 37%                    | 1976               | No              |
| Akron                                                               | OH                        | 166                 | 63                               | 54                        | 26%                    | 1977               | No              |
| Cincinnati                                                          | OH                        | 352                 | 102                              | 77                        | 43%                    | 1973               | No              |
| Cleveland                                                           | OH                        | 582                 | 169                              | 138                       | 56%                    | 1979               | No              |
| Columbus                                                            | OH                        | 263                 | 110                              | 96                        | 27%                    | 1979               | No              |
| Dayton                                                              | OH                        | 236                 | 63                               | 54                        | 36%                    | 1976               | No              |
| Toledo                                                              | OH                        | 144                 | 75                               | 57                        | 26%                    | 1980               | No              |
| Oklahoma City                                                       | OK                        | 168                 | 74                               | 69                        | 21%                    | 1972               | No              |
| Tulsa                                                               | OK                        | 125                 | 77                               | 73                        | 13%                    | 1971               | No              |
| Portland                                                            | OR                        | 251                 | 81                               | 70                        | 8%                     | 1974               | No              |
| Philadelphia                                                        | PA                        | 1,134               | 411                              | 265                       | 60%                    | 1978               | Yes             |
| Pittsburgh                                                          | PA                        | 622                 | 107                              | 70                        | 39%                    | 1980               | No              |
| Charleston                                                          | SC                        | 88                  | 63                               | 56                        | 45%                    | 1970               | Yes             |
| Greenville                                                          | SC                        | 141                 | 58                               | 55                        | 21%                    | 1970               | Yes             |
| El Paso                                                             | TX                        | 101                 | 63                               | 60                        | 3%                     | 1978               | No              |
| Fort Worth                                                          | TX                        | 187                 | 87                               | 83                        | 26%                    | 1973               | No              |
| Houston                                                             | TX                        | 469                 | 252                              | 235                       | 32%                    | 1971               | No              |
| San Antonio                                                         | TX                        | 231                 | 83                               | 73                        | 15%                    | 1969               | No              |
| Norfolk                                                             | VA                        | 262                 | 61                               | 55                        | 41%                    | 1970               | Yes             |
| Seattle                                                             | WA                        | 342                 | 95                               | 82                        | 12%                    | 1978               | No              |
| Milwaukee                                                           | WI                        | 343                 | 158                              | 120                       | 25%                    | 1976               | No              |
| <b>Panel B: Large Central School Districts Not in Sample</b>        |                           |                     |                                  |                           |                        |                    |                 |
| Washington                                                          | DC                        | 754                 | 153                              | 135                       | 93%                    | None               | Yes             |
| Albuquerque                                                         | NM                        | 103                 | 86                               | 80                        | 3%                     | None               | Yes             |
| New York                                                            | NY                        | 1,746               | 1,468                            | 1,088                     | 35%                    | None               | Yes             |
| <b>Panel C: Medium Sized Central School Districts in Sample</b>     |                           |                     |                                  |                           |                        |                    |                 |
| Little Rock                                                         | AR                        | 87                  | 28                               | 26                        | 38%                    | 1971               | No              |
| San Bernardino                                                      | CA                        | 277                 | 38                               | 36                        | 14%                    | 1978               | No              |
| San Jose                                                            | CA                        | 268                 | 37                               | 35                        | 2%                     | 1986               | No              |
| Vallejo                                                             | CA                        | 58                  | 14                               | 13                        | 25%                    | 1975               | No              |

**Table A1: Sample Districts and Attributes, continued**

| City of Central District                                                   | State of Central District | 1970 MSA Enrollment | 1970 Central District Enrollment | 1970 CD Public Enrollment | 1970 CD Public % Black | Desegregation Year | County District  |
|----------------------------------------------------------------------------|---------------------------|---------------------|----------------------------------|---------------------------|------------------------|--------------------|------------------|
| <b>Panel C: Medium Sized Central School Districts in Sample, continued</b> |                           |                     |                                  |                           |                        |                    |                  |
| Hartford                                                                   | CT                        | 242                 | 31                               | 26                        | 46%                    | 1966               | No               |
| Daytona Beach                                                              | FL                        | 33                  | 32                               | 30                        | 22%                    | 1969               | Yes              |
| Fort Myers                                                                 | FL                        | 20                  | 20                               | 19                        | 18%                    | 1969               | Yes              |
| Albany                                                                     | GA                        | 25                  | 23                               | 22                        | 40%                    | 1980               | Yes              |
| Columbus                                                                   | GA                        | 58                  | 40                               | 39                        | 31%                    | 1971               | Yes              |
| Rockford                                                                   | IL                        | 77                  | 44                               | 38                        | 11%                    | 1973               | No               |
| Fort Wayne                                                                 | IN                        | 104                 | 51                               | 39                        | 14%                    | 1971               | No               |
| South Bend                                                                 | IN                        | 58                  | 41                               | 34                        | 16%                    | 1981               | No               |
| Lexington-Fayette                                                          | KY                        | 64                  | 36                               | 34                        | 16%                    | 1972               | Yes              |
| Alexandria                                                                 | LA                        | 30                  | 30                               | 28                        | 32%                    | 1969               | Yes              |
| Houma                                                                      | LA                        | 40                  | 21                               | 20                        | 17%                    | 1969               | Yes              |
| Lake Charles                                                               | LA                        | 40                  | 40                               | 38                        | 25%                    | 1969               | Yes              |
| Springfield                                                                | MA                        | 133                 | 37                               | 28                        | 20%                    | 1974               | No               |
| Grand Rapids                                                               | MI                        | 205                 | 48                               | 33                        | 21%                    | 1968               | No               |
| Lansing                                                                    | MI                        | 88                  | 32                               | 29                        | 12%                    | 1972               | No               |
| Wilmington                                                                 | NJ                        | 25                  | 19                               | 18                        | 29%                    | 1969               | Yes              |
| Jersey                                                                     | NY                        | 121                 | 54                               | 35                        | 41%                    | 1976               | No               |
| Rochester                                                                  | NC                        | 237                 | 56                               | 41                        | 33%                    | 1970               | No               |
| Lawton                                                                     | OK                        | 23                  | 21                               | 20                        | 14%                    | 1973               | No               |
| Columbia                                                                   | SC                        | 74                  | 42                               | 40                        | 43%                    | 1970               | No               |
| Amarillo                                                                   | TX                        | 34                  | 30                               | 28                        | 6%                     | 1972               | No               |
| Lubbock                                                                    | TX                        | 42                  | 34                               | 33                        | 11%                    | 1978               | No               |
| Odessa                                                                     | TX                        | 43                  | 24                               | 24                        | 6%                     | 1982               | Yes              |
| Waco                                                                       | TX                        | 32                  | 19                               | 18                        | 21%                    | 1973               | No               |
| Roanoke                                                                    | VA                        | 44                  | 19                               | 18                        | 26%                    | 1970               | Yes <sup>C</sup> |
| Tacoma                                                                     | WA                        | 95                  | 39                               | 35                        | 9%                     | 1968               | No               |

Note: Panel A lists information on central school districts that had enrollment exceeding 50,000 in 1968 as measured in Welch and Light (1987). Welch and Light use school district reported enrollments as of 1968, in contrast to the 1970 Census based enrollment measure reported here. Panel B lists information on those central districts with enrollment exceeding 50,000 in 1968 which were not included in the sample because they never had a major desegregation order or had very high or low minority enrollment. Panel C lists all remaining central districts in the sample as investigated by Welch and Light. These districts had enrollment between 15,000 and 50,000 in 1968 and were 10 to 90 percent black. All numbers are for 1970 district geographies. \*District consolidated into one or more surrounding districts at some point after 1970. <sup>C</sup>This district is or was comprised fully of one county that changed over time.

**Table A2: Impacts of Desegregation on Total Enrollment**

|                                | <u>ln(white total enrollment)</u> | <u>ln(black total enrollment)</u> |
|--------------------------------|-----------------------------------|-----------------------------------|
|                                | <u>1</u>                          | <u>2</u>                          |
| <b>Panel A: National</b>       |                                   |                                   |
| <b>Desegregated</b>            | -0.09**<br>(0.04)                 |                                   |
| <b>Desegregated (5+)</b>       |                                   | 0.12***<br>(0.03)                 |
| <b>Panel B: Regional</b>       |                                   |                                   |
| <b>(Deseg)*(South)</b>         | -0.12**<br>(0.06)                 |                                   |
| <b>(Deseg)*(Non-South)</b>     | -0.02<br>(0.05)                   |                                   |
| <b>(Deseg 5+)*(South)</b>      |                                   | -0.01<br>(0.04)                   |
| <b>(Deseg 5+)*(Non-South)</b>  |                                   | 0.18***<br>(0.04)                 |
| <b>MSA &amp; Year-South FE</b> | X                                 | X                                 |

Note: See note to Table 2 for an explanation of the sample and variables.

**Table A3: Impacts of Desegregation on MSA Level Outcomes**

|                                | <u>ln(public<br/>enrollment)</u> | <u>ln(private<br/>enrollment)</u> | <u>ln(total<br/>population)</u> |
|--------------------------------|----------------------------------|-----------------------------------|---------------------------------|
|                                | <b>1</b>                         | <b>2</b>                          | <b>3</b>                        |
| <b>Panel A: Whites</b>         |                                  |                                   |                                 |
| <b>(Deseg)*(South)</b>         | -0.02<br>(0.04)                  | 0.09<br>(0.07)                    | -0.04<br>(0.03)                 |
| <b>(Deseg)*(Non-South)</b>     | 0.00<br>(0.03)                   | 0.08<br>(0.08)                    | 0.02<br>(0.03)                  |
| <b>Panel B: Blacks</b>         |                                  |                                   |                                 |
| <b>(Deseg)*(South)</b>         | 0.00<br>(0.02)                   | -0.43***<br>(0.16)                | 0.01<br>(0.02)                  |
| <b>(Deseg)*(Non-South)</b>     | -0.13<br>(0.09)                  | -0.01<br>(0.18)                   | -0.10<br>(0.09)                 |
| <b>(Deseg 5+)*(South)</b>      | -0.01<br>(0.03)                  | -0.33<br>(0.24)                   | -0.01<br>(0.04)                 |
| <b>(Deseg 5+)*(Non-South)</b>  | 0.14**<br>(0.03)                 | -0.06<br>(0.08)                   | 0.08**<br>(0.03)                |
| <b>MSA &amp; Year-South FE</b> | X                                | X                                 | X                               |

Note: The unit of observation is the MSA; otherwise the sample is the same as used in Table 2. See note to Table 2 for an explanation of the sample and variables.

**Figure A1: Fraction White by Residential Location**

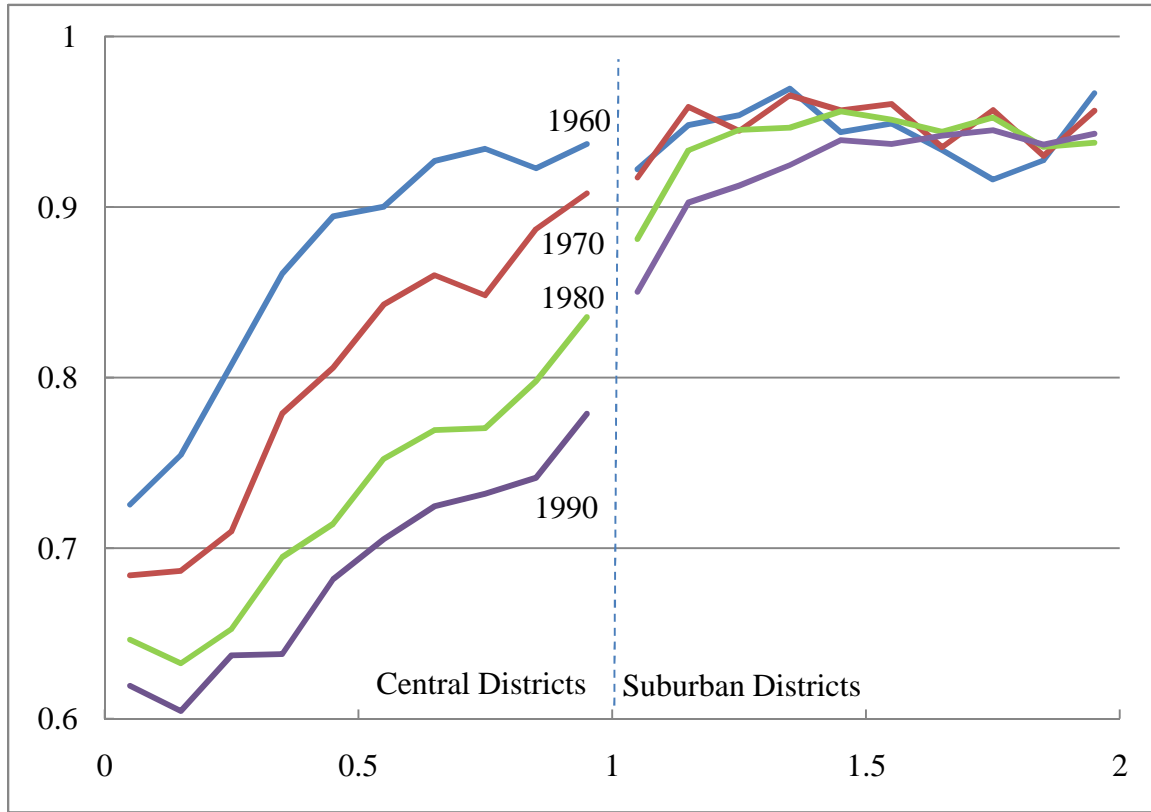

Note: Graph shows the average ratio of residential white to white plus black population as a function of CBD distance across metropolitan areas in our sample for which census tract data are available. The sample includes the 64 metropolitan areas with central districts that were tracted in 1960 and experienced major desegregation orders. Metropolitan areas with fewer than 6 suburban tracts in any year are excluded. Each metropolitan area is weighted equally at all locations on the graph. The horizontal axis shows locations indexed as the cumulative distribution functions of 1990 population with respect to CBD distance inside and outside of central districts.

**Figure A2: Income by Race and Residential Location**

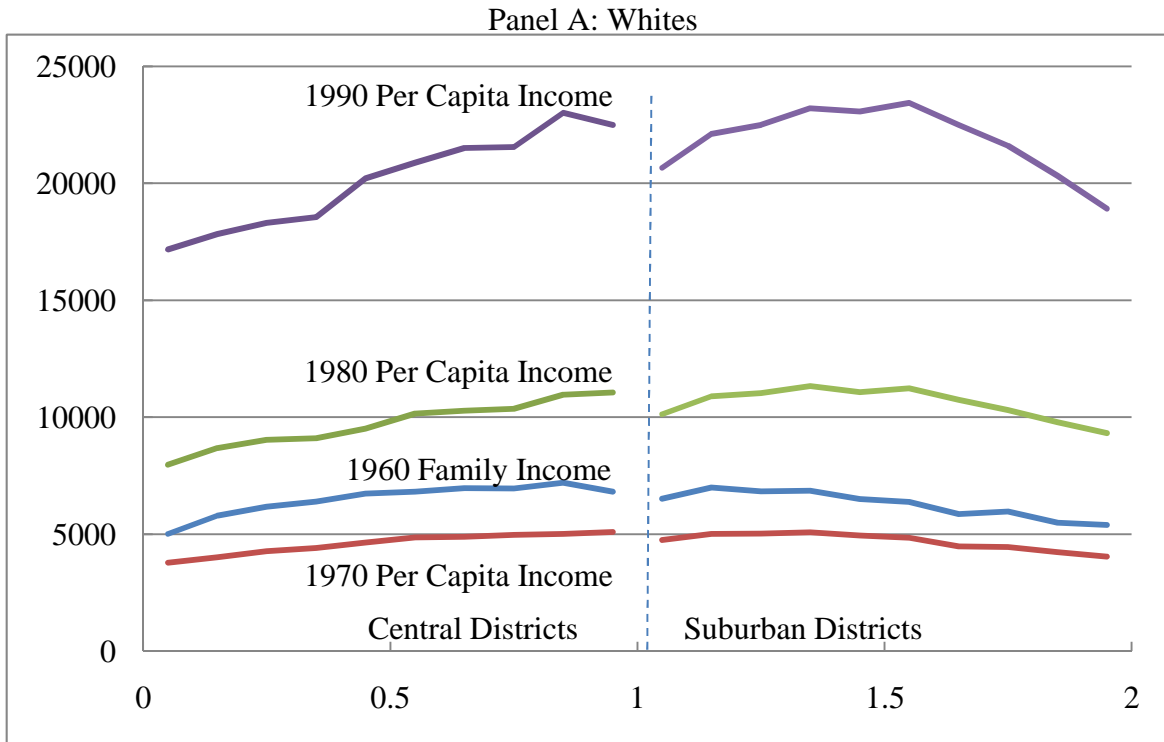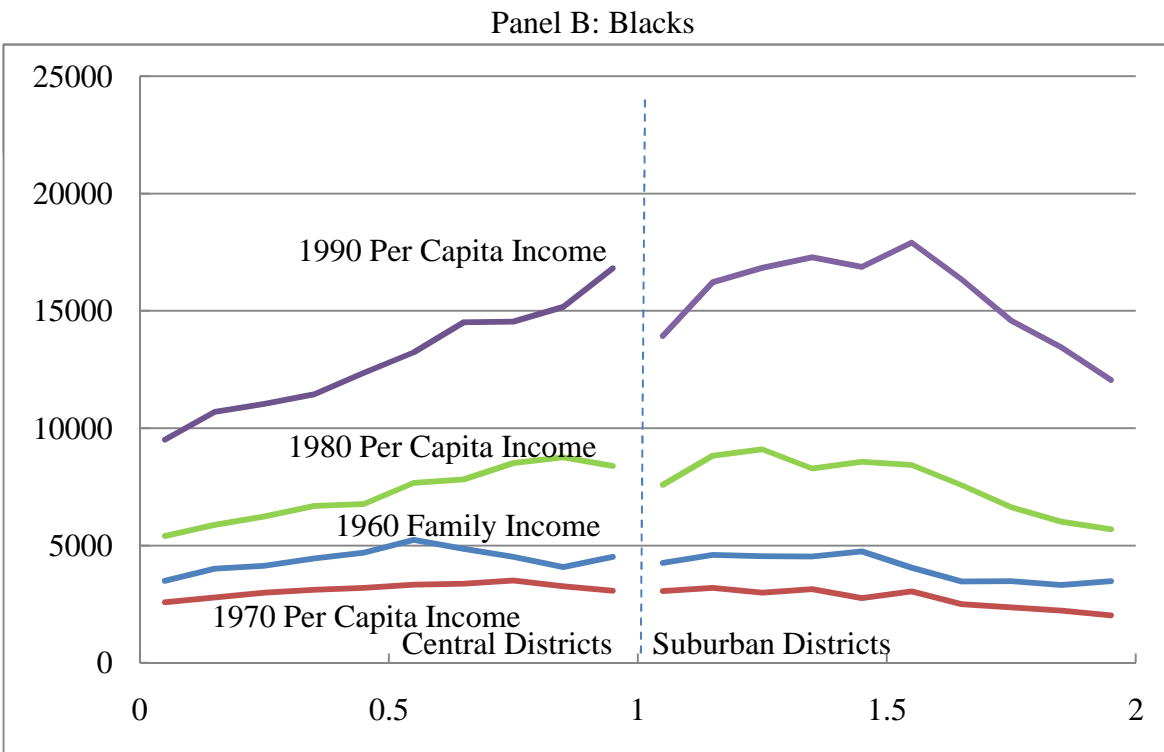

Note: Graphs show median family or per capita income by race as a function of CBD distance across metropolitan areas. See the notes to Figure A1 for explanations of the sample, distance metric and weighting.
